# Supplementary material for: Anti-Diabetic Effects of Jiang Tang Xiao Ke Granule via PI3K/Akt Signalling Pathway in Type 2 Diabetes KKAy Mice
Source: PubMed Central journal article supplement (PMC5207690; doi:10.1371/journal.pone.0168980), 2017-01-03

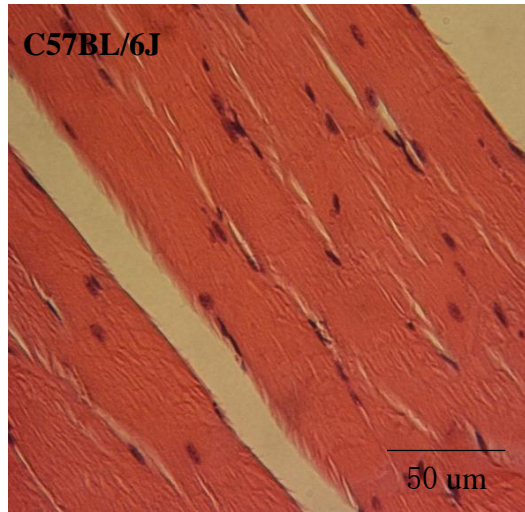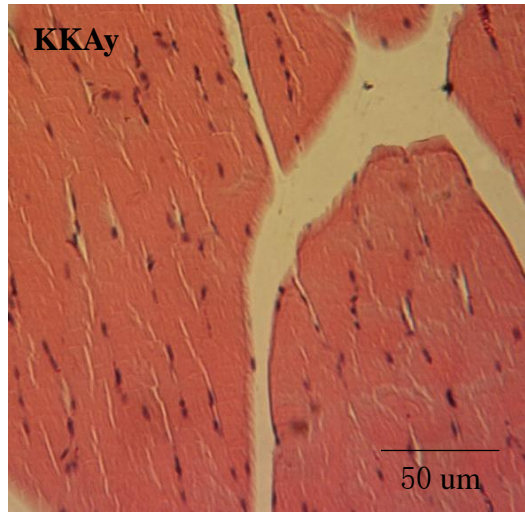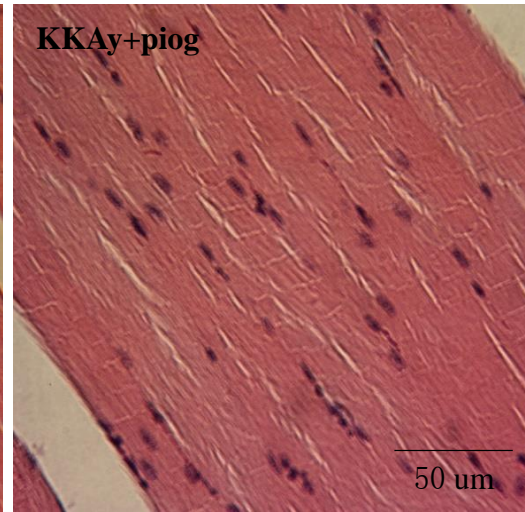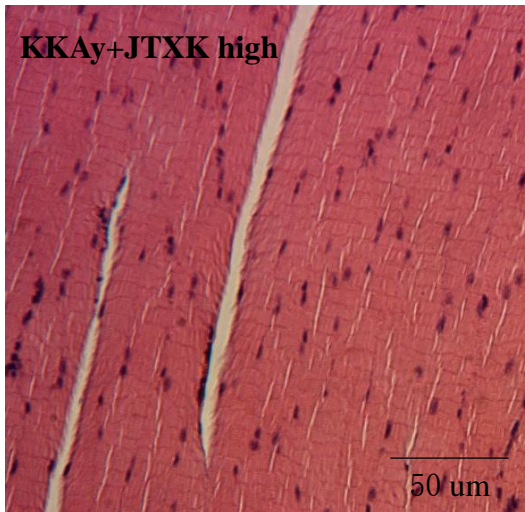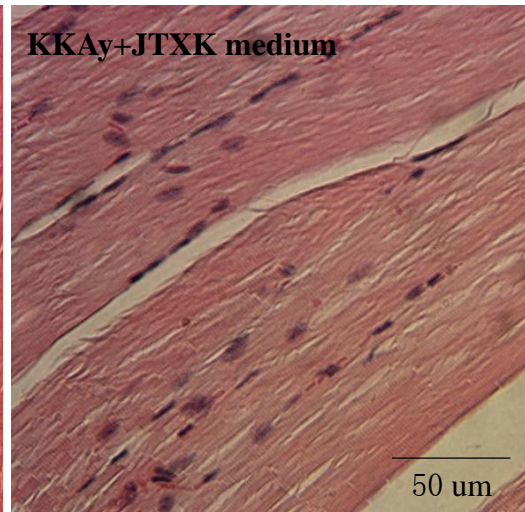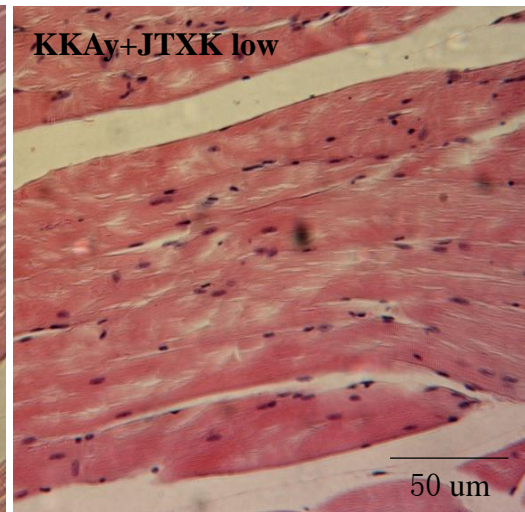

Supplement: pone.0168980.s002.pdf [file pone.0168980.s002.pdf]
