# Supplementary material for: Anti-Diabetic Effects of Jiang Tang Xiao Ke Granule via PI3K/Akt Signalling Pathway in Type 2 Diabetes KKAy Mice
Source: PubMed Central journal article supplement (PMC5207690; doi:10.1371/journal.pone.0168980), 2017-01-03
Supplement: pone.0168980.s003.pdf [file pone.0168980.s003.pdf]

Table 1 List of Primer Sequences for RT-PCR.

| Gene    | primer          | sequences                |
|---------|-----------------|--------------------------|
| IRS-1   | Forward (5'→3') | CAGGCACCATCTCAACAATC     |
|         | Reverse (3'→5') | GTTTCCCACCCACCATACTG     |
| Pik3r1  | Forward (5'→3') | CCTTGGAGAGGTTTGACCATTA   |
|         | Reverse (3'→5') | CATCCCAGCTATGCTGTATCTATC |
| Akt1    | Forward (5'→3') | GGCAGGATGTGTATGAGAAGAA   |
|         | Reverse (3'→5') | GTGATCATCTGAGCTGTGAACT   |
| GSK-3β  | Forward (5'→3') | GCCAATGCAGAGGTCCTAAA     |
|         | Reverse (3'→5') | CGAAAGGGAAGAGAAGGTAACA   |
| Glut4   | Forward (5'→3') | CCCACAGAAAGTGATTGAACAG   |
|         | Reverse (3'→5') | AGAGAGCCCAAAGGGTAGTGAG   |
| β-actin | Forward (5'→3') | CACCCGCGAGTACAACCTTC     |
|         | Reverse (3'→5') | CCCATACCCACCATCACACC     |
